# Supplementary material
Source: Elsevier journal article supplement (https://www.sciencedirect.com/science/article/pii/S1578219019301118)
Supplement: mmc2 [file S1578219019301118:mmc2.pdf]

## Supplemental information 1

Table 1. MINORS score and Risk of bias assessment

|               | Clearly stated aim | Inclusion of consecutive patients | Prospective data collection | Endpoints appropriate to study aim | Unbiased assessment of study endpoint | Follow-up period appropriate to study aim | <5% lost of follow-up | Prospective calculation of study size | Adequate control group | Contemporary groups | Baseline equivalence of | Adequate statistical analyses | TOTAL | Risk of bias (low/high) |
|---------------|--------------------|-----------------------------------|-----------------------------|------------------------------------|---------------------------------------|-------------------------------------------|-----------------------|---------------------------------------|------------------------|---------------------|-------------------------|-------------------------------|-------|-------------------------|
| Prospective   |                    |                                   |                             |                                    |                                       |                                           |                       |                                       |                        |                     |                         |                               |       |                         |
| Sabat 2012    | 2                  | 2                                 | 2                           | 2                                  | 2                                     | 2                                         | 2                     | 0                                     | 2                      | 2                   | 2                       | 2                             | 20    | Low                     |
| Miller 2014   | 2                  | 2                                 | 1                           | 2                                  | 2                                     | 2                                         | 2                     | 2                                     | 2                      | 2                   | 2                       | 2                             | 23    | Low                     |
| Pascual 2016  | 1                  | 2                                 | 2                           | 1                                  | 2                                     | 2                                         | 2                     | 0                                     | 2                      | 2                   | 2                       | 2                             | 20    | Low                     |
| Retrospective |                    |                                   |                             |                                    |                                       |                                           |                       |                                       |                        |                     |                         |                               |       |                         |
| Shalom 2015   | 2                  | 0                                 | 1                           | 2                                  | 2                                     | 1                                         | 2                     | 0                                     | 2                      | 2                   | 2                       | 2                             | 18    | High                    |
| Gold 2014     | 2                  | 0                                 | 0                           | 2                                  | 2                                     | 2                                         | 2                     | 0                                     | 2                      | 2                   | 2                       | 2                             | 18    | High                    |
